# Supplementary figures and images for: Application characteristics and clinical effectiveness of clinical finding staging in guiding non-surgical treatment of knee osteoarthritis involving 92 medical institutions
Source: PubMed Central journal article supplement — J Orthop Surg Res. 2024 Dec 20;19:862. doi: 10.1186/s13018-024-05374-8 (PMC11660770; doi:10.1186/s13018-024-05374-8), 2024-12-20

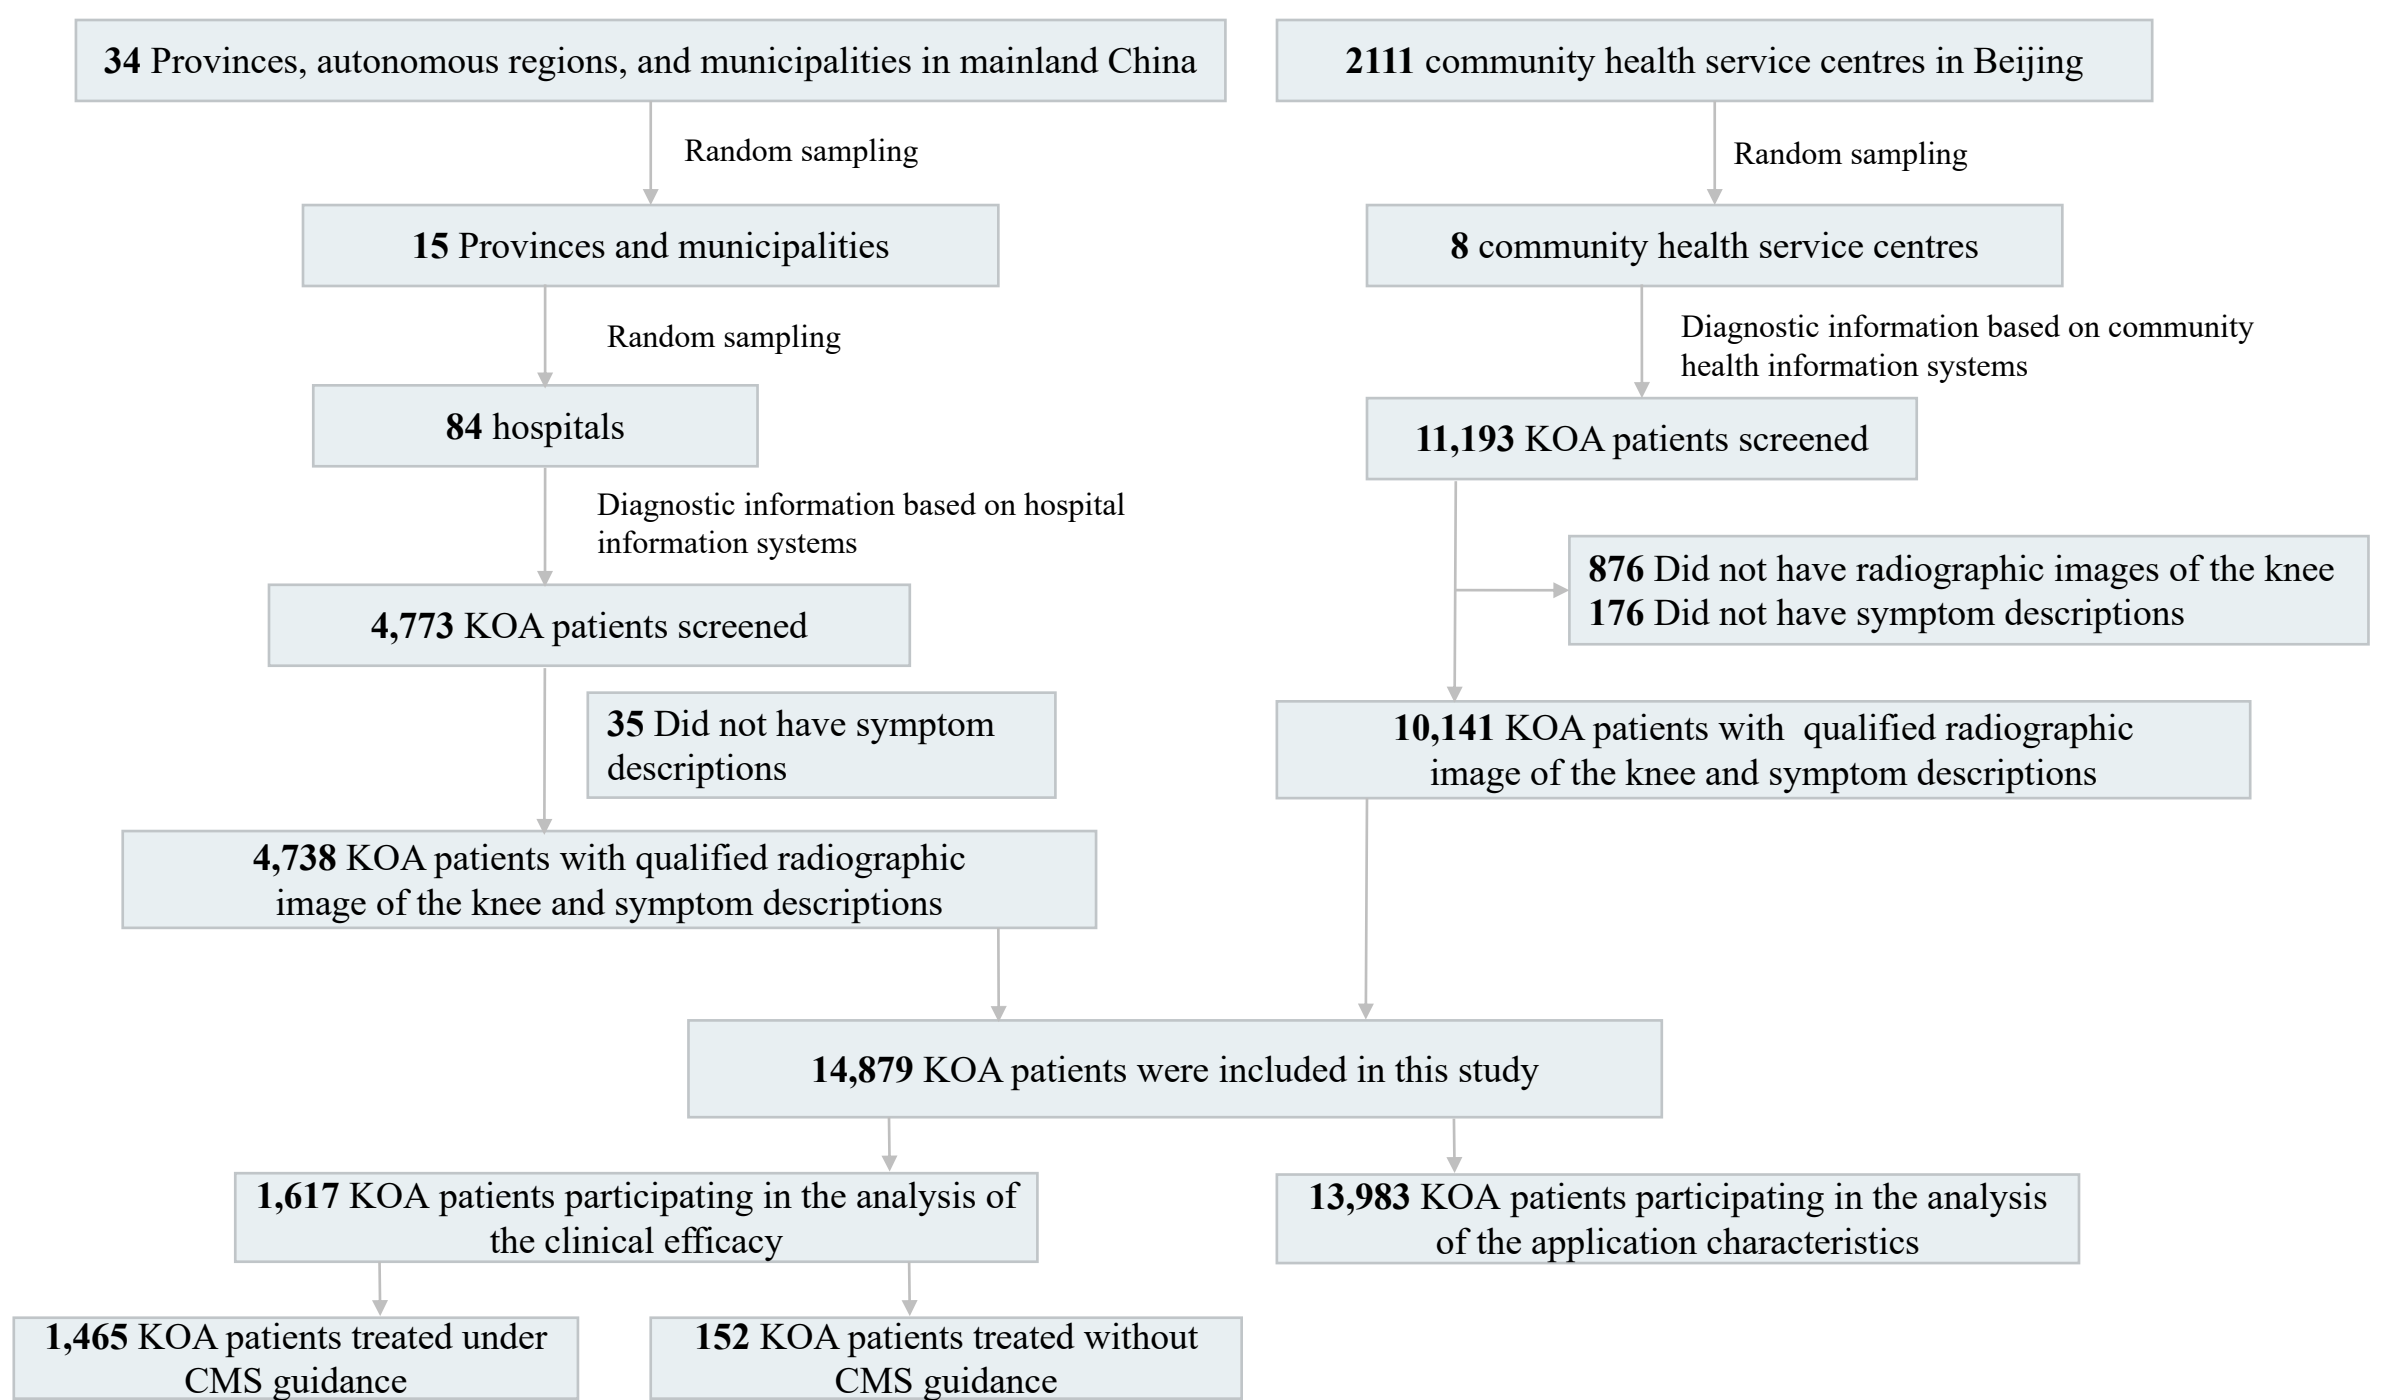

Supplement: 13018_2024_5374_MOESM2_ESM.pdf [file 13018_2024_5374_MOESM2_ESM.pdf]

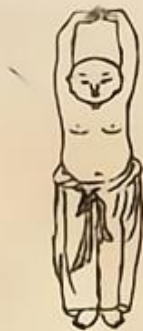

两手托天理三焦

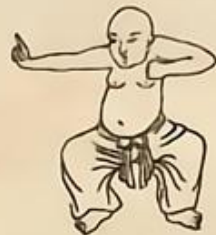

左右开弓似射雕

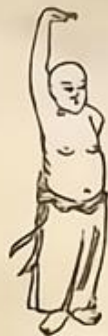

调理脾胃需单举

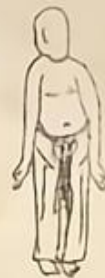

五劳七伤往后瞧

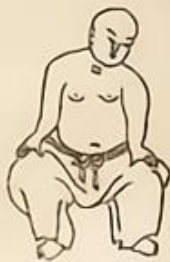

摇头摆尾去心火

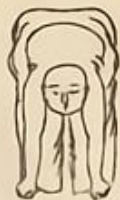

双手攀足固肾腰

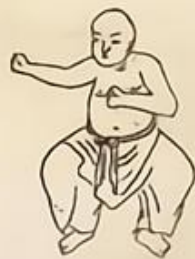

攒拳明目增气力

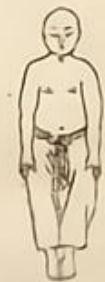

升后七颠百病消

Supplement: 13018_2024_5374_MOESM3_ESM.pdf [file 13018_2024_5374_MOESM3_ESM.pdf]

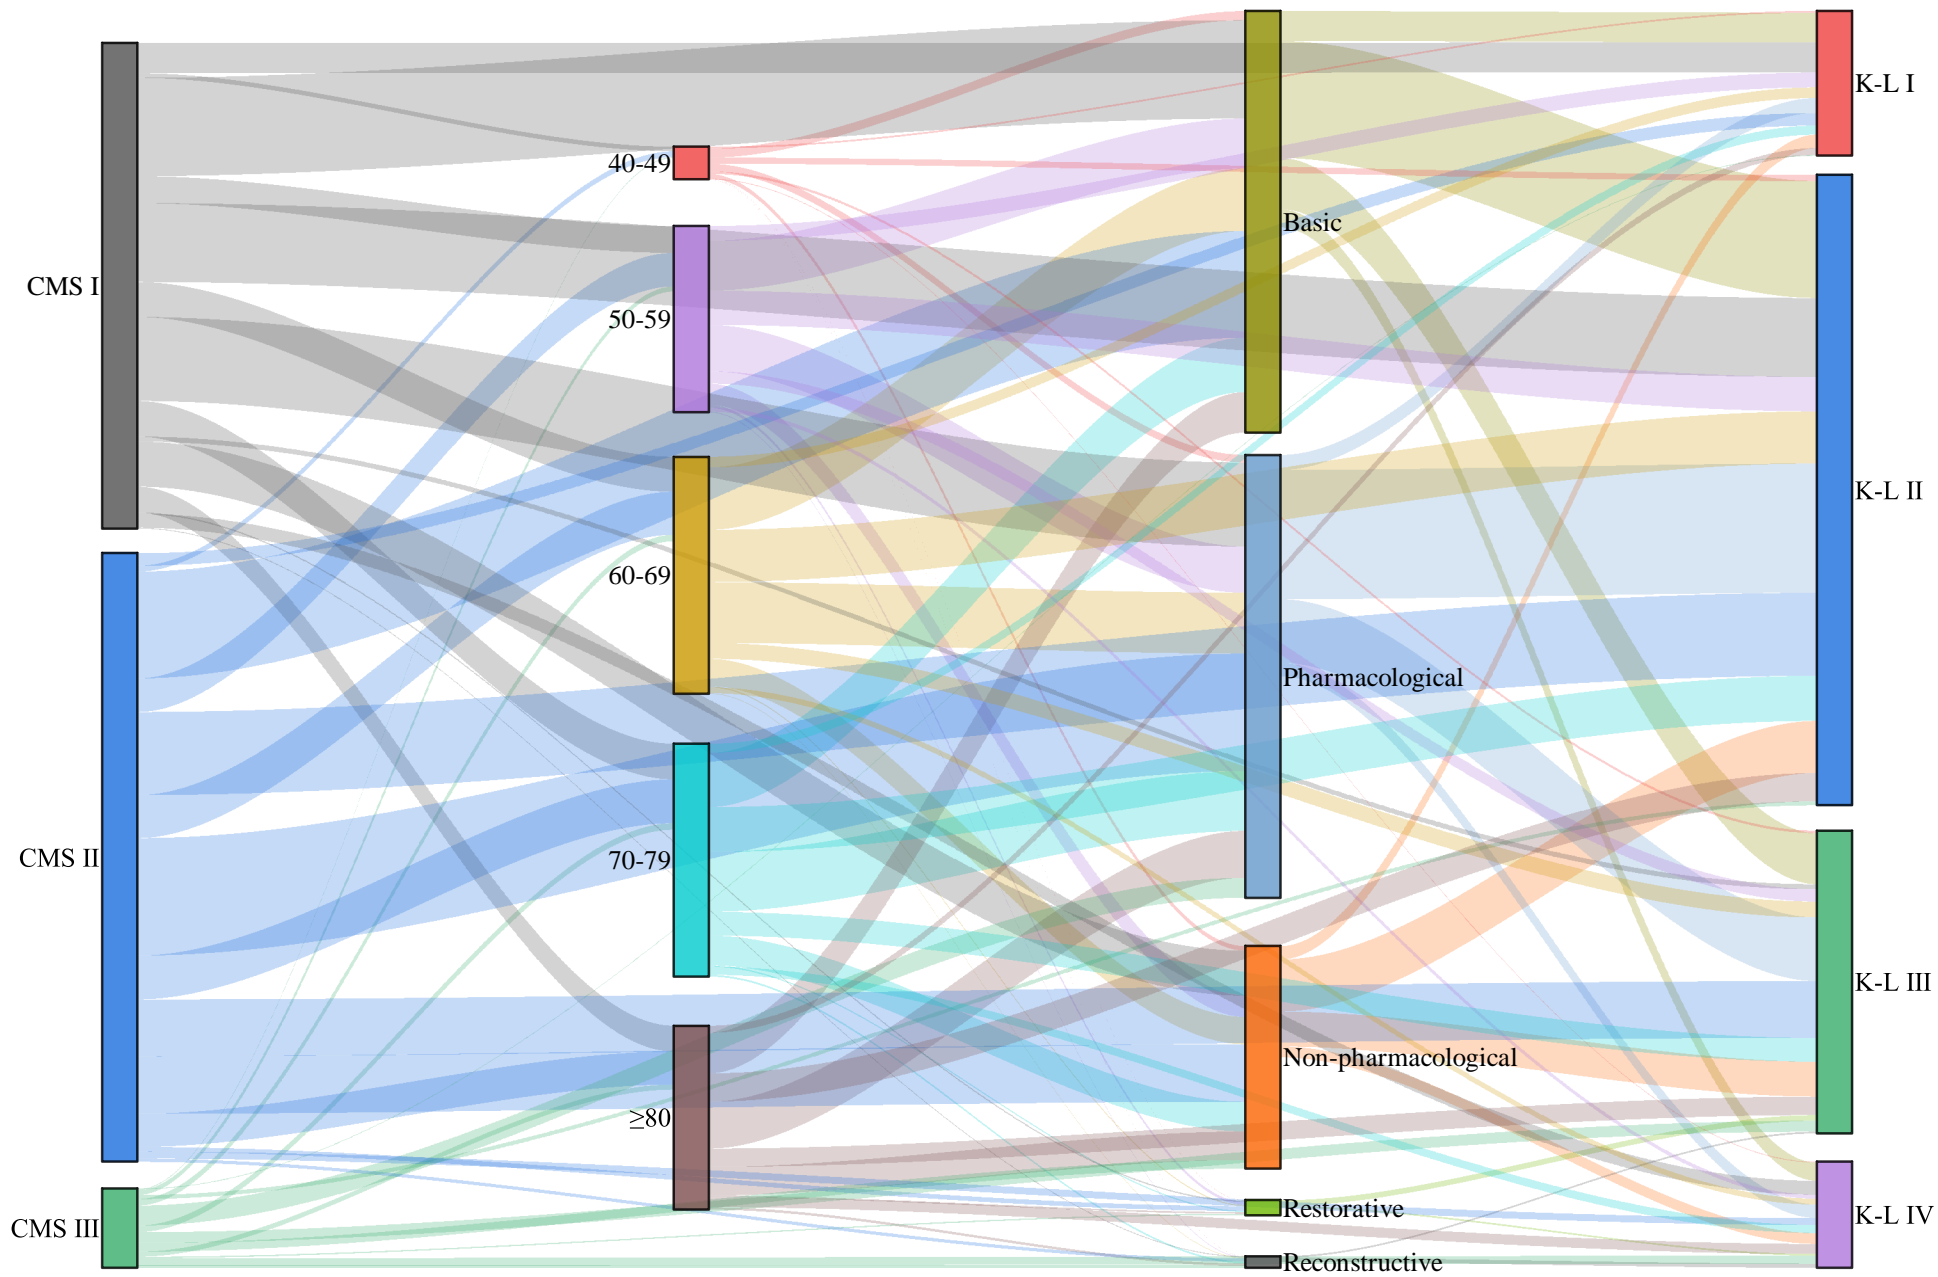

Supplement: 13018_2024_5374_MOESM4_ESM.pdf [file 13018_2024_5374_MOESM4_ESM.pdf]
